# Supplementary material for: Fate of hydroxyapatite nanoparticles during dynamic in vitro gastrointestinal digestion: the impact of milk as a matrix
Source: Royal Society of Chemistry journal article supplement (doi:10.1039/d0fo02702b), 2021-01-01
Supplement: d0fo02702b1.pdf [file d0fo02702b1.pdf]

1

## Supporting Information for

2 **Fate of Hydroxyapatite Nanoparticles during Dynamic in vitro**

3 **Gastrointestinal Digestion: The Impact of Milk as a Matrix**

4

5 **Kinley Choki,<sup>1</sup> Siqu Li,<sup>1</sup> Aiqian Ye,<sup>1\*</sup> Geoffrey B. Jameson,<sup>1,2</sup> and Harjinder Singh<sup>1</sup>**

6

7 <sup>1</sup> Riddet Institute, Massey University, Private Bag 11 222, Palmerston North 4442, New

8 Zealand

9 <sup>2</sup> School of Fundamental Sciences, Massey University, Private Bag 11 222, Palmerston North

10 4442, New Zealand

## 11 Dissolution calculation

12 Dissolution of nHA in nHA<sub>blank</sub>:

$$13 \quad D_{t_1-2} = \frac{m_{t_2} - m_{\text{carryover } t_1}}{m_{\text{total}}} \times 100\%$$

$$14 \quad m_{t_2} = (C_{\text{HA blank } t_2} - C_{\text{SGF } t_2}) \times V_{t_2} \times M$$

$$15 \quad m_{\text{carryover } t_1} = (C_{\text{HA blank } t_1} - C_{\text{SGF } t_1}) \times V'_{t_1} \times M$$

16 Dissolution of nHA in nHA<sub>milk</sub>:

$$17 \quad D_{t_1-2} = \frac{m_{t_2} - m_{\text{carryover } t_1}}{m_{\text{total}}} \times 100\%$$

$$18 \quad m_{t_2} = (C_{\text{HA milk } t_2} - C_{\text{milk blank } t_2}) \times V_{t_2} \times M$$

$$19 \quad m_{\text{carryover } t_1} = (C_{\text{HA milk } t_1} - C_{\text{milk blank } t_1}) \times V'_{t_1} \times M$$

20 where:

21 t – digestion time

22  $D_{t_1-2}$  – dissolution of HA between times  $t_1$  and  $t_2$  as a percentage of total HA added

23  $m_t$  – weight of calcium dissolved from HA at time t

24  $m_{\text{carryover } t}$  – weight of carryover calcium dissolved from HA at time t

25  $C_t$  – ionic calcium concentration at time t

26  $V_t$  – volume of digesta at time t (before sampling)

27  $V'_t$  – volume of digesta at time t (after sampling)

28  $M$  – molecular mass of calcium

29  $m_{\text{total}}$  – weight of total calcium in added HA

30 **Table S1. Buffering capacity of nHA dispersion (420 mg in 250 mL MilliQ water)**

| <b>pH range</b> | <b>Buffering capacity (dB/dpH)</b> |
|-----------------|------------------------------------|
| <b>6.4-6.9</b>  | <b>0.0006</b>                      |
| <b>5.4-6.4</b>  | <b>0.0028</b>                      |
| <b>5.0-5.4</b>  | <b>0.0100</b>                      |
| <b>4.5-5.0</b>  | <b>0.0210</b>                      |
| <b>4.0-4.5</b>  | <b>0.0086</b>                      |
| <b>3.4-4.0</b>  | <b>0.0034</b>                      |
| <b>3.1-3.4</b>  | <b>0.0058</b>                      |
| <b>2.6-3.1</b>  | <b>0.0084</b>                      |

31

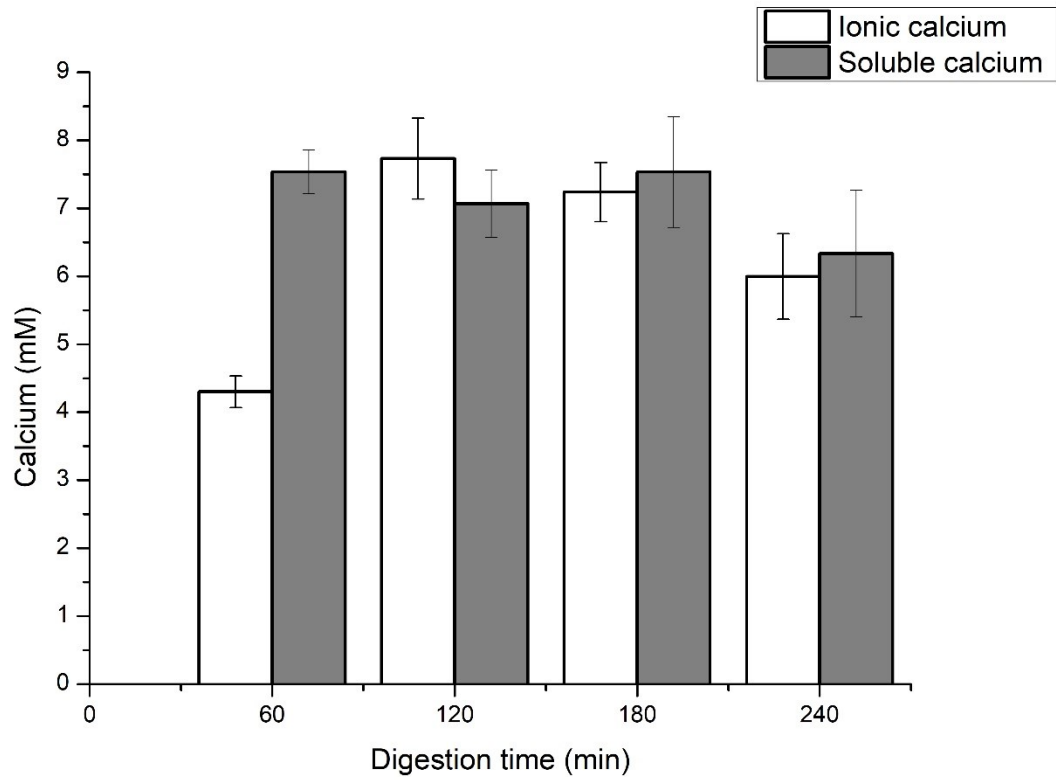

32

33 **Figure S1.** Ionic calcium and soluble calcium concentrations of nHA<sub>milk</sub> digesta at different  
34 gastric digestion times.

35

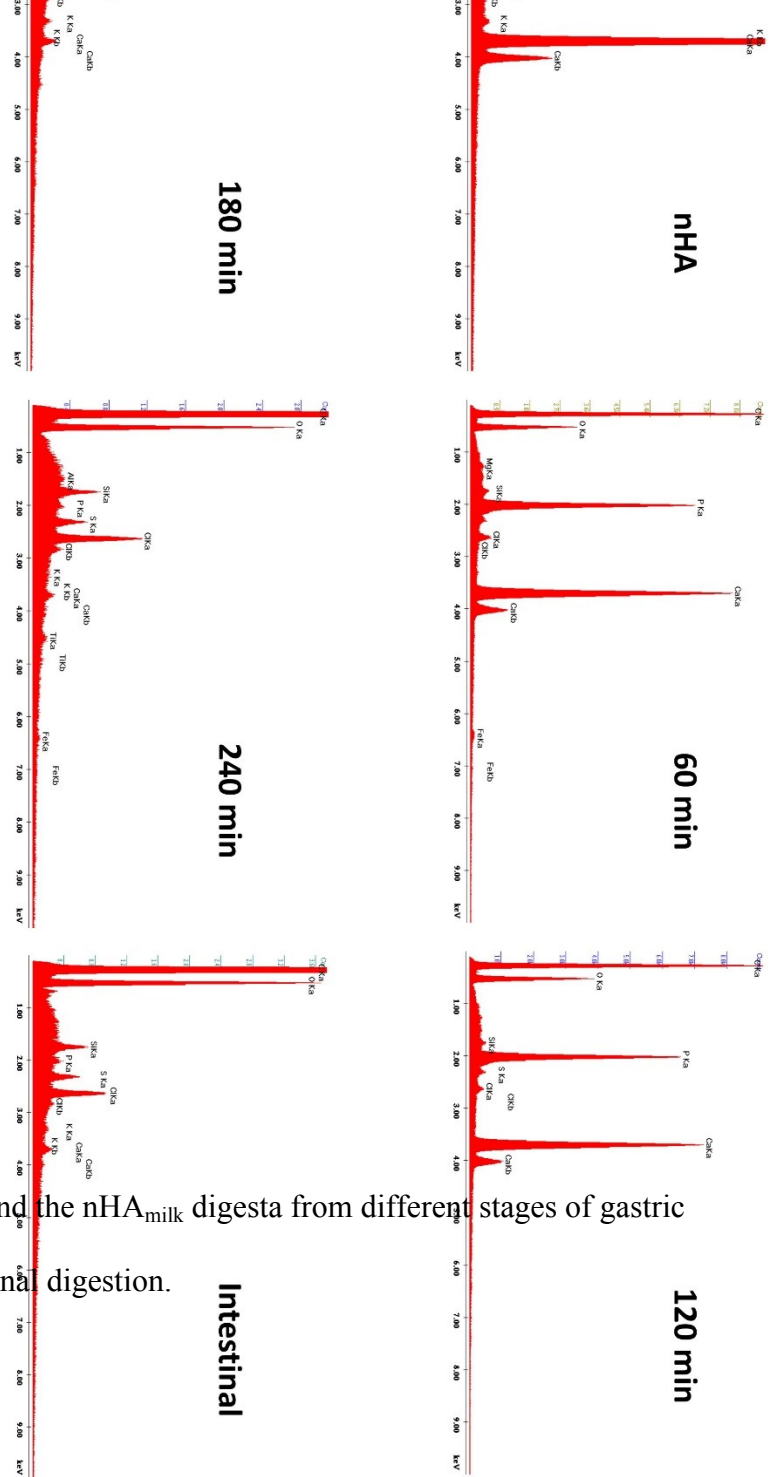

36

37 **Figure S2.** EDS graphs of nHA and the nHA<sub>milk</sub> digesta from different stages of gastric  
 38 digestion and by the end of intestinal digestion.
